# Supplementary material for: Effect of Manganese Distribution on Sensor Properties of SnO2/MnOx Nanocomposites
Source: MDPI journal article supplement (doi:10.3390/nano13091437), 2023-04-22
Supplement: s1 [file s1]

# Effect of Manganese Distribution on Sensor Properties of SnO<sub>2</sub>/MnO<sub>x</sub> Nanocomposites

Rodion Eshmakov <sup>1</sup>, Darya Filatova <sup>1</sup>, Elizaveta Konstantinova <sup>2</sup>, and Marina Rumyantseva <sup>1</sup>

<sup>1</sup> Chemistry Department, Moscow State University, 119991 Moscow, Russia

<sup>2</sup> Physics Department, Moscow State University, 119991 Moscow, Russia

## Supplementary Information

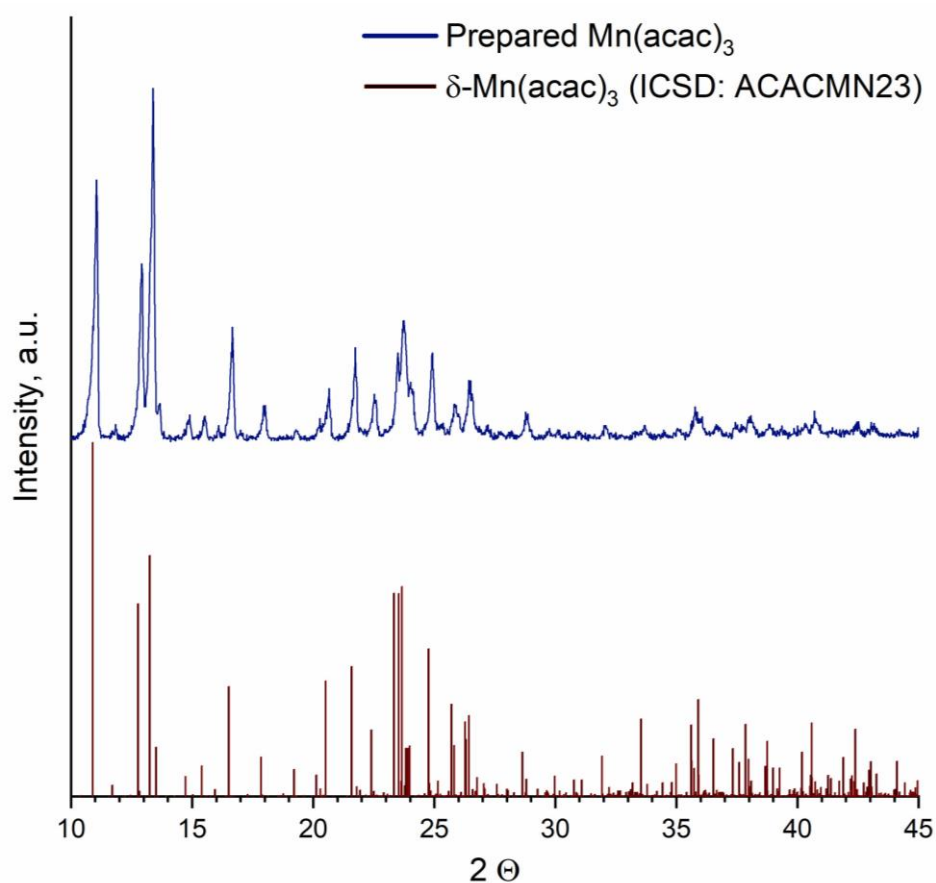

Figure S1. Powder X-ray diffraction pattern of synthesized Mn(acac)<sub>3</sub> in comparison with calculated pattern of δ-Mn(acac)<sub>3</sub>.

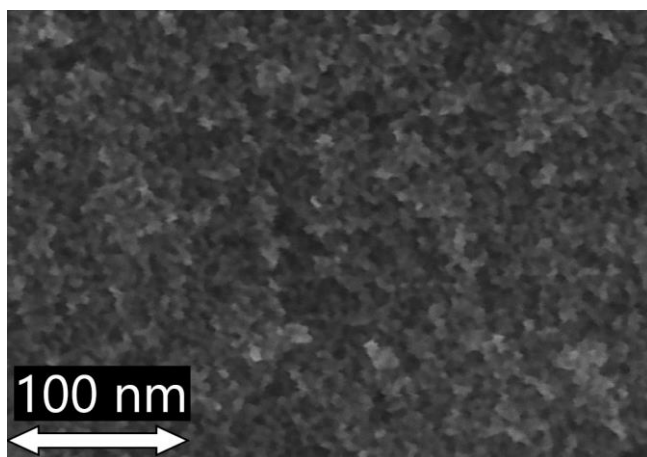

(a)

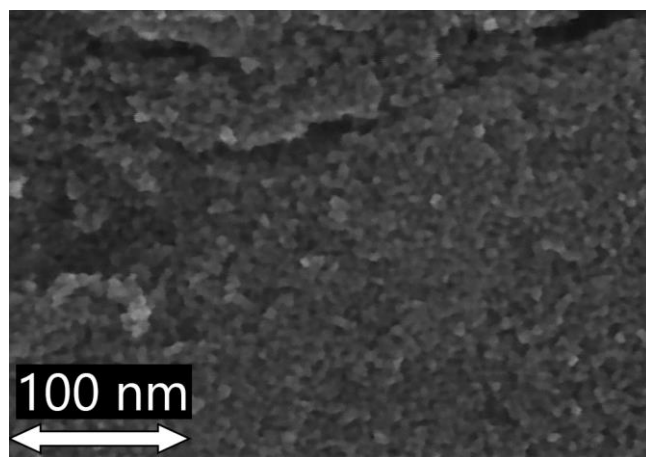

(b)

**Figure S2.** SEM images obtained with Zeiss Supra 40 FE-SEM microscope at  $\times 750 \cdot 10^3$  of the following samples: (a) SnO<sub>2</sub>\_Mn10; (b) SnO<sub>2</sub>\_Mn1\_w.

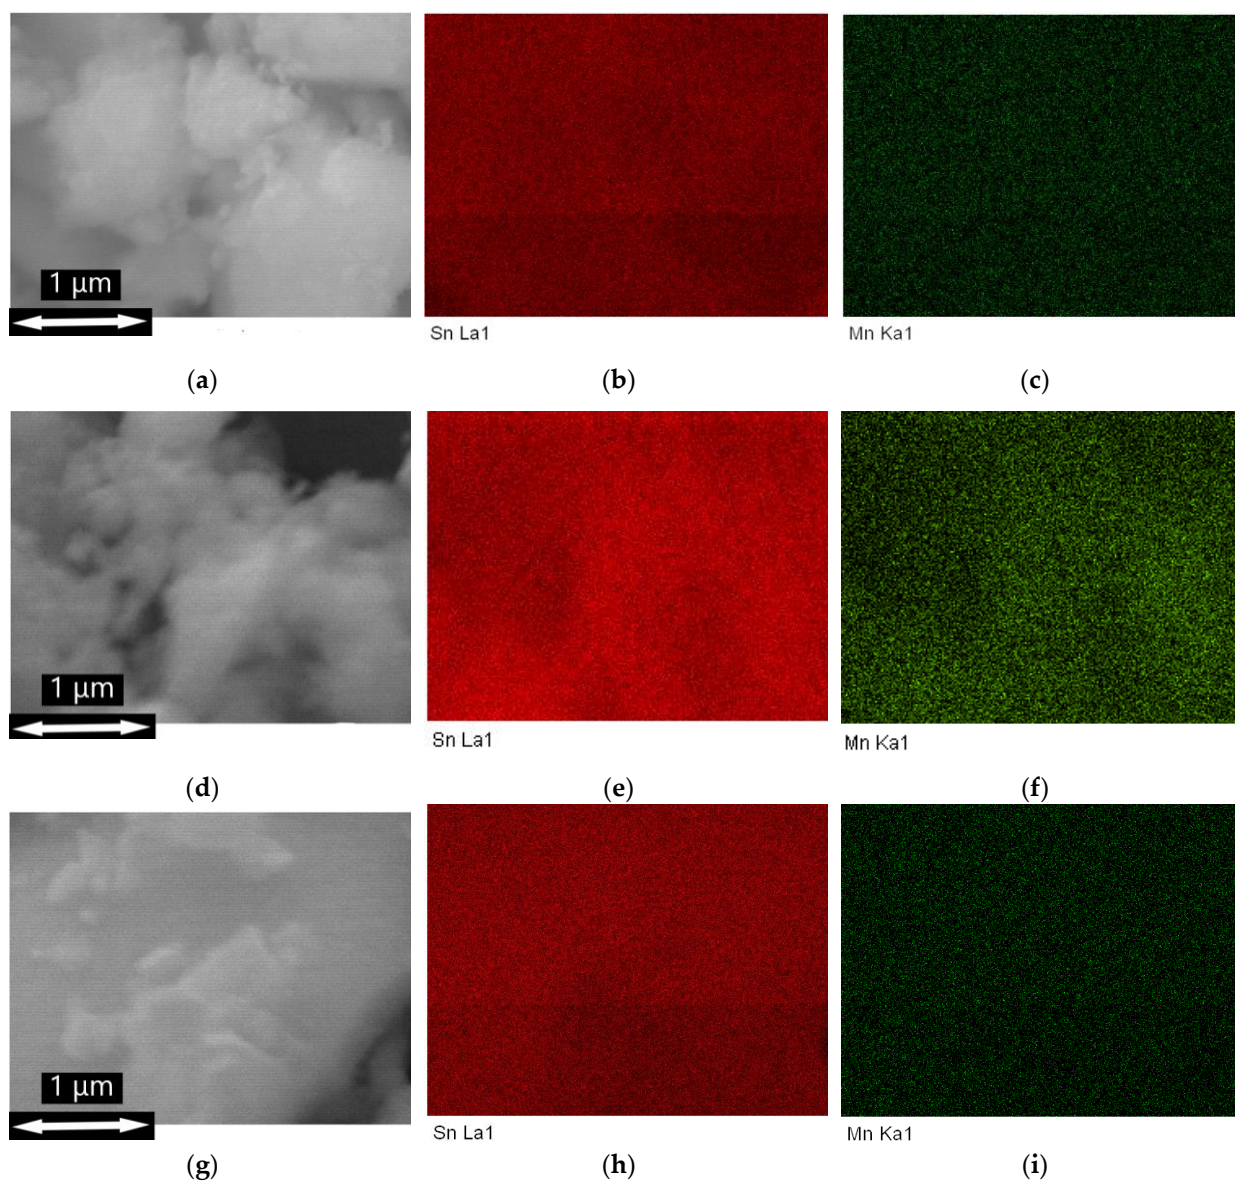

**Figure S3.** SEM images, Sn and Mn EDX maps of SnO<sub>2</sub>\_Mn1 (a-c), SnO<sub>2</sub>\_Mn10 (d-f), SnO<sub>2</sub>\_Mn10\_w (g-i), respectively, at  $\times 10^5$  magnification.
